# Supplementary figures and images for: Faceted wrinkling by contracting a curved boundary
Source: Royal Society of Chemistry journal article supplement (doi:10.1039/d3sm01347b), 2024-01-01

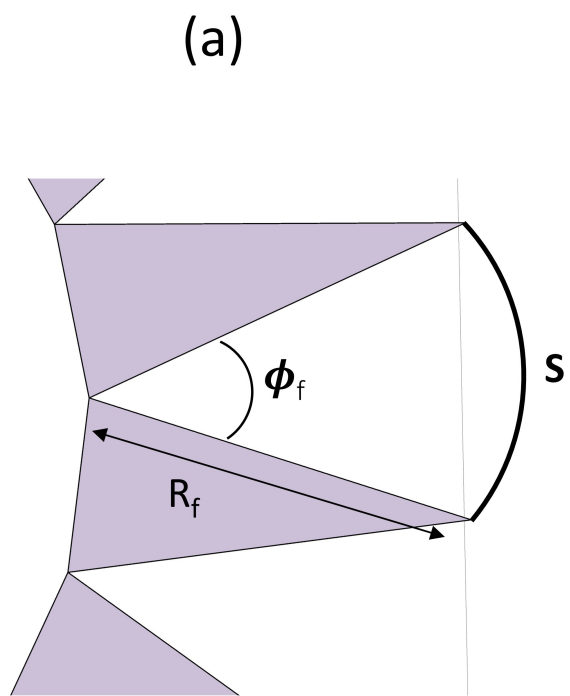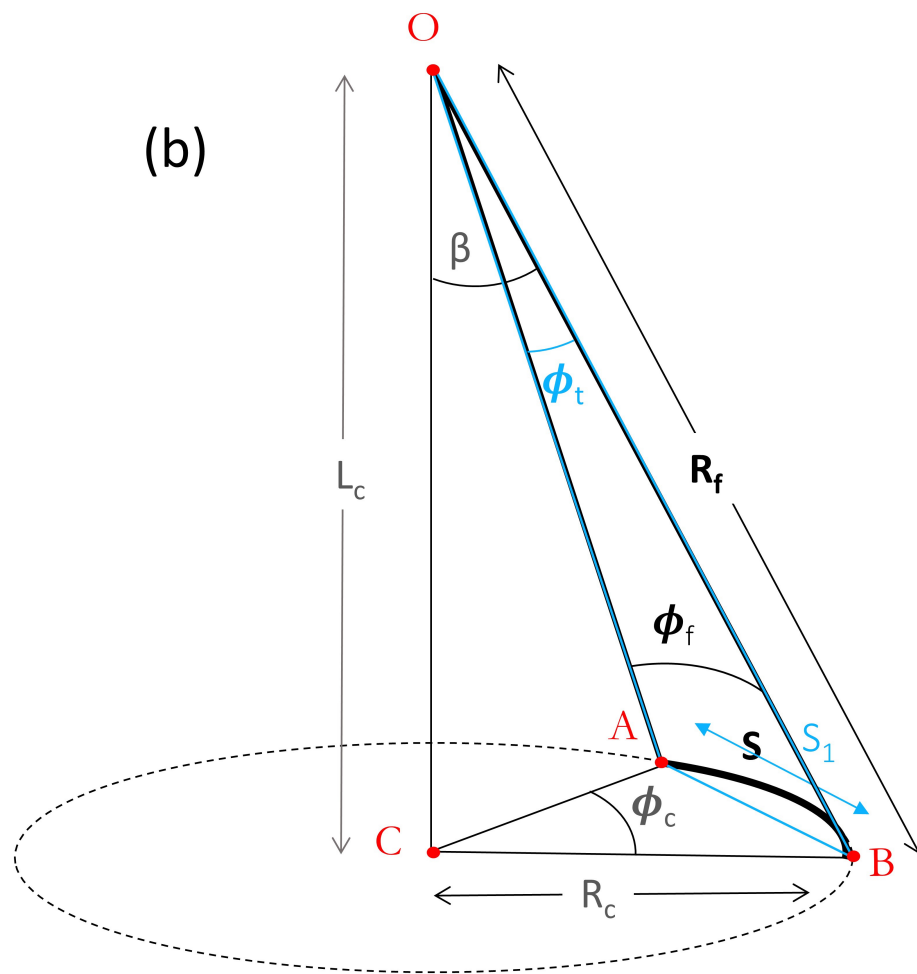

Supplement: d3sm01347b2.pdf [file d3sm01347b2.pdf]

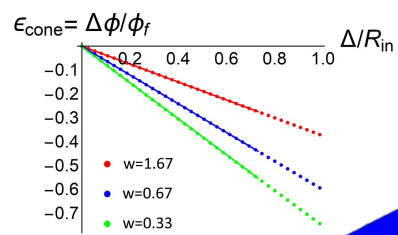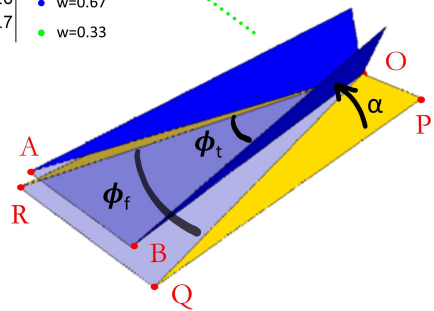

(a)

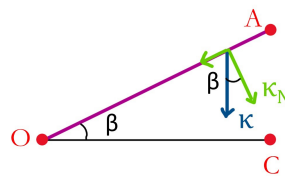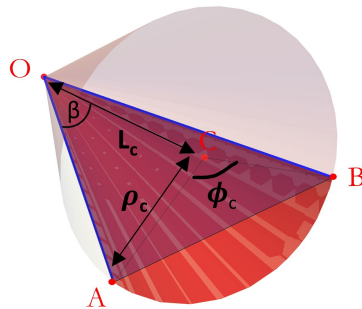

(b)

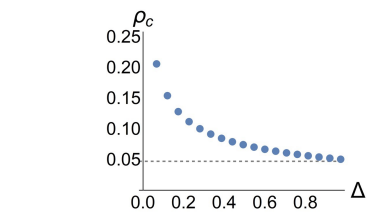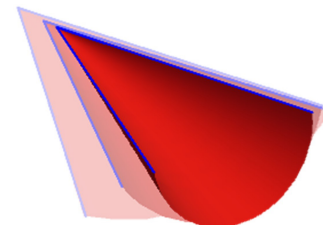

(c)

Supplement: d3sm01347b3.pdf [file d3sm01347b3.pdf]

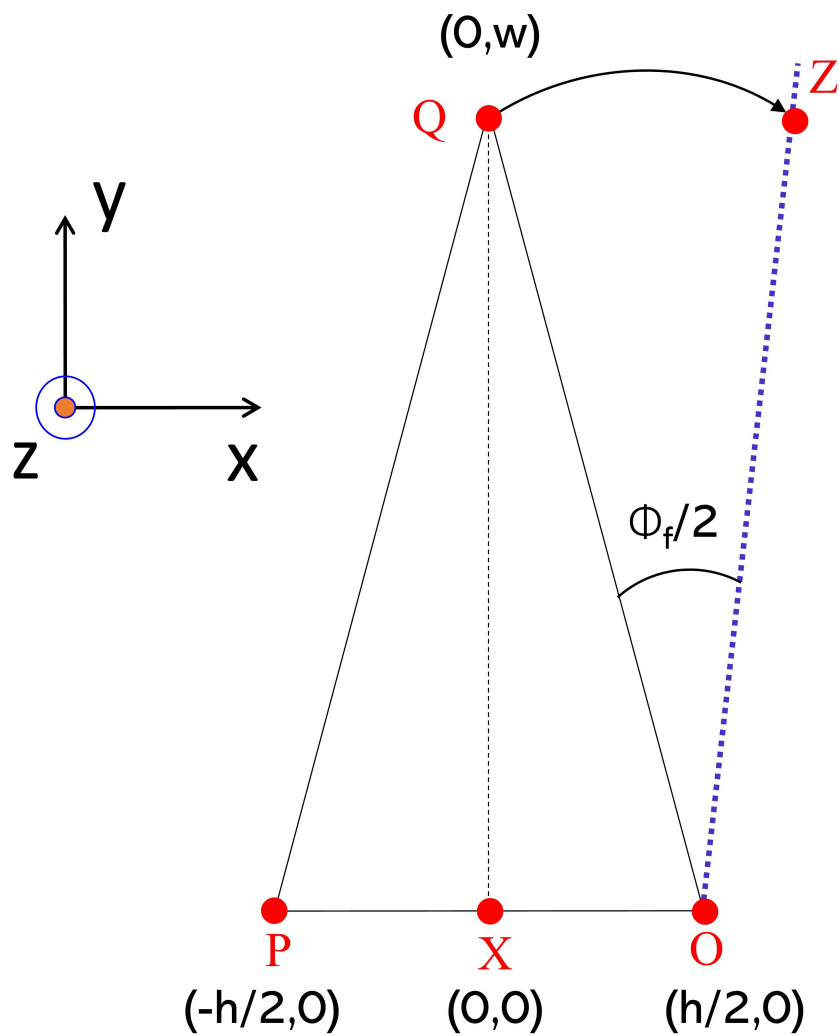

Supplement: d3sm01347b4.pdf [file d3sm01347b4.pdf]

$\phi_f < 180^\circ$

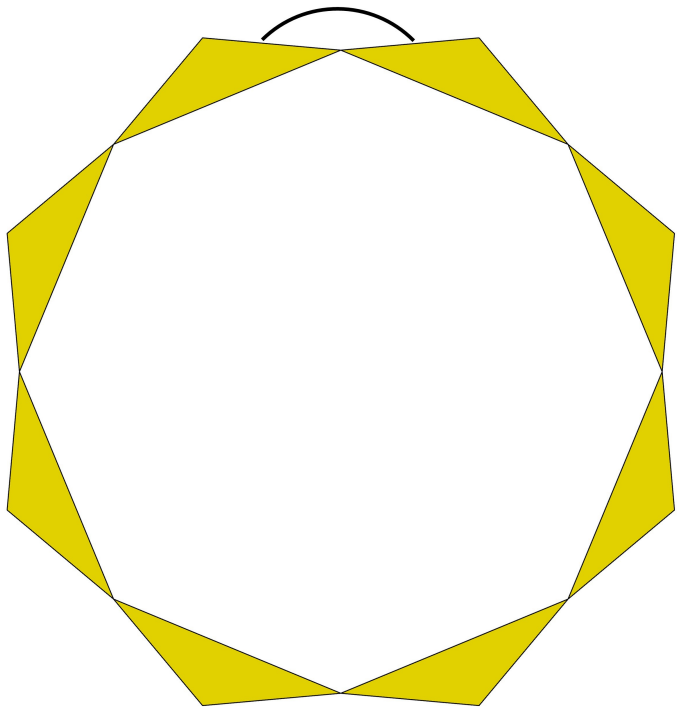

$\phi_f > 180^\circ$

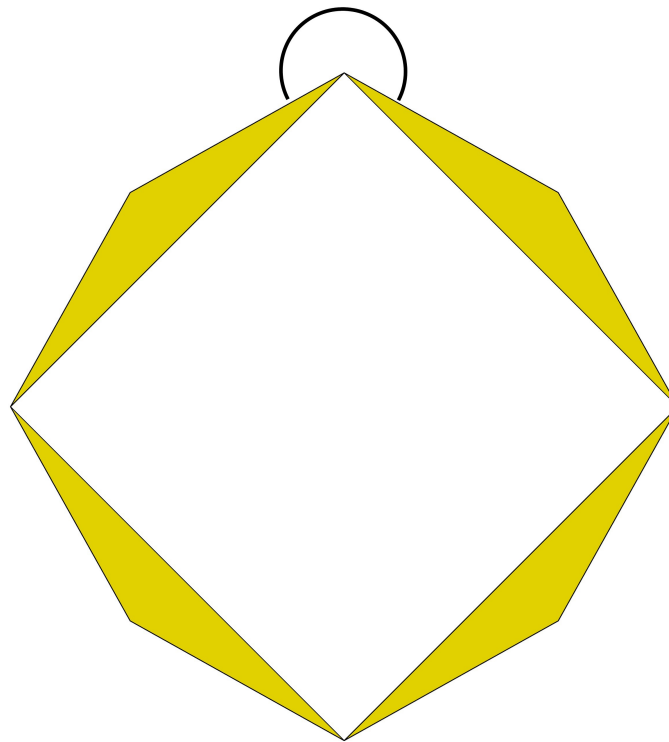

Supplement: d3sm01347b5.pdf [file d3sm01347b5.pdf]

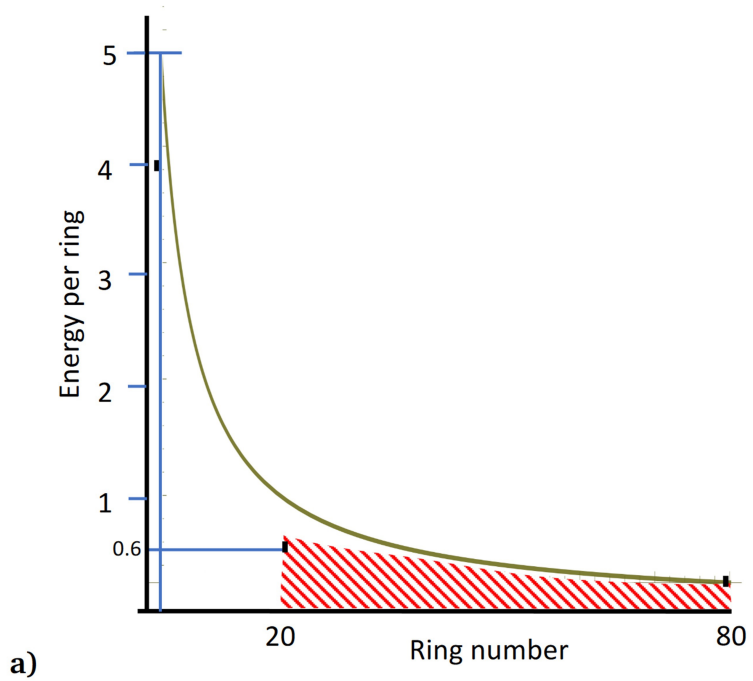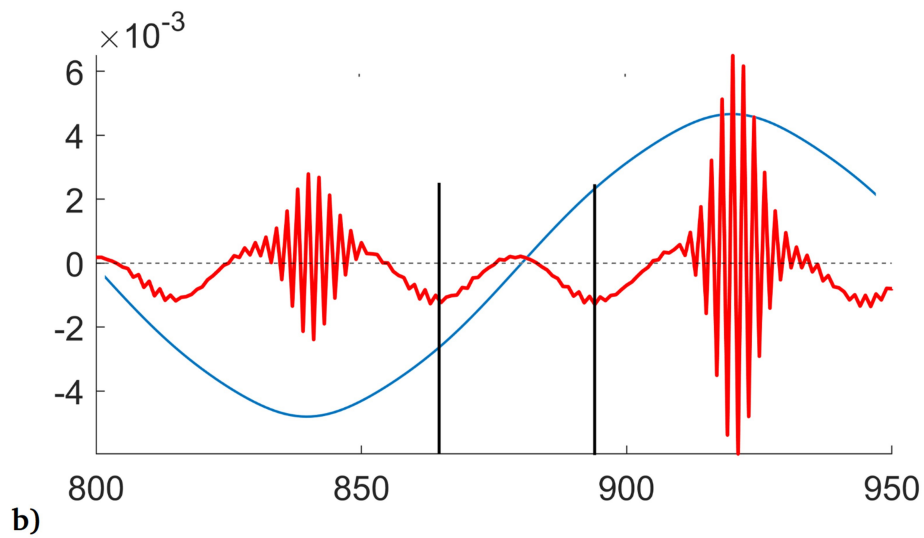

Supplement: d3sm01347b6.pdf [file d3sm01347b6.pdf]
